# Supplementary material for: Antimicrobial Resistance in Bacterial Pathogens and Detection of Carbapenemases in Klebsiella pneumoniae Isolates from Hospital Wastewater
Source: PubMed Central journal article supplement (PMC6783922; doi:10.3390/antibiotics8030085), 2019-06-27
Supplement: antibiotics-08-00085-s001.pdf [file antibiotics-08-00085-s001.pdf]

## Supplementary Files

**Table S1.** Antibiotic resistance profile of *Staphylococcus aureus*.

| Isolate<br>No./Antibiotics | PEN | VAN | TEC | ERY | CIP | CC | QDA | FOX | GEN |
|----------------------------|-----|-----|-----|-----|-----|----|-----|-----|-----|
| 1                          | R   | S   | S   | R   | R   | R  | S   | R   | S   |
| 2                          | R   | S   | S   | R   | R   | R  | S   | R   | S   |
| 3                          | R   | S   | S   | R   | R   | R  | S   | R   | R   |
| 4                          | R   | S   | S   | R   | R   | R  | S   | R   | R   |
| 5                          | R   | S   | S   | R   | R   | R  | R   | R   | R   |
| 6                          | R   | R   | R   | R   | R   | R  | R   | R   | R   |

PEN, penicillin G; VAN, vancomycin; TEC, teicoplanin; ERY, erythromycin; CIP, ciprofloxacin; CC, clindamycin; QDA, quinupristin/dalfopristin; FOX, ceftazidime; GEN, gentamicin.

S: Susceptible; R: Resistant.

**Table S2.** Antibiotic resistance profile of *Enterococcus* spp.

| Isolate<br>No./Antibiotics | PEN | AMP | VAN | TEC | ERY | CIP | QDA | LZD | TET |
|----------------------------|-----|-----|-----|-----|-----|-----|-----|-----|-----|
| 1                          | R   | R   | R   | R   | R   | R   | R   | R   | R   |
| 2                          | R   | R   | R   | R   | R   | R   | R   | R   | R   |
| 3                          | S   | S   | S   | S   | R   | S   | R   | S   | S   |
| 4                          | R   | R   | R   | R   | R   | R   | R   | R   | R   |
| 5                          | S   | R   | S   | S   | S   | S   | R   | R   | S   |
| 6                          | S   | R   | S   | S   | S   | R   | R   | R   | R   |
| 7                          | R   | R   | R   | R   | R   | R   | R   | R   | R   |

PEN, penicillin G; AMP, ampicillin; VAN, vancomycin; TEC, teicoplanin; ERY, erythromycin; CIP, ciprofloxacin; QDA, quinupristin/dalfopristin; LZD, linezolid; TET, tetracycline.

S: Susceptible; R: Resistant.

**Table S3.** Antibiotic resistance profile of *Escherichia coli*.

| Isolate<br>No./Antibiotics | AMP | AMC | AMK | GEN | FOX | CRO | CAZ | FEP | CIP | ATM | SXT | TET |
|----------------------------|-----|-----|-----|-----|-----|-----|-----|-----|-----|-----|-----|-----|
| 1                          | R   | R   | S   | S   | R   | R   | R   | R   | R   | S   | R   | S   |
| 2                          | R   | R   | R   | R   | R   | R   | R   | R   | R   | S   | R   | R   |
| 3                          | R   | R   | S   | S   | R   | R   | R   | R   | R   | R   | R   | S   |
| 4                          | R   | R   | S   | S   | I   | R   | R   | I   | R   | R   | R   | R   |
| 5                          | R   | R   | S   | S   | R   | R   | R   | R   | R   | I   | R   | R   |
| 6                          | R   | R   | S   | S   | R   | R   | R   | R   | S   | R   | R   | R   |
| 7                          | R   | R   | S   | S   | R   | R   | R   | S   | R   | S   | S   | R   |
| 8                          | R   | R   | S   | S   | R   | R   | R   | R   | R   | R   | S   | S   |
| 9                          | R   | R   | R   | I   | R   | R   | R   | R   | R   | R   | R   | S   |
| 10                         | R   | R   | R   | R   | R   | R   | I   | I   | R   | S   | R   | R   |
| 11                         | R   | S   | S   | S   | R   | R   | R   | R   | S   | S   | S   | S   |
| 12                         | R   | S   | S   | S   | S   | R   | S   | S   | I   | S   | I   | I   |
| 13                         | R   | R   | S   | S   | R   | R   | R   | R   | R   | R   | S   | S   |
| 14                         | R   | R   | S   | S   | S   | R   | S   | S   | R   | R   | R   | R   |

|    |   |   |   |   |   |   |   |   |   |   |   |   |
|----|---|---|---|---|---|---|---|---|---|---|---|---|
| 15 | R | R | R | R | R | R | R | R | R | I | R | I |
| 16 | R | R | R | R | R | R | R | R | R | S | S | R |
| 17 | R | R | S | R | I | R | S | S | R | R | R | R |
| 18 | R | R | S | S | S | R | S | S | R | R | R | R |
| 19 | R | S | S | S | S | R | S | S | R | R | R | R |
| 20 | R | R | I | R | I | R | S | I | R | R | R | S |
| 21 | R | R | R | R | R | R | R | R | R | S | R | S |
| 22 | R | S | S | S | R | R | R | S | S | S | S | S |
| 23 | R | S | S | S | I | R | R | S | S | S | S | S |
| 24 | R | R | S | S | R | R | R | R | R | S | R | S |

AMP, ampicillin; AMC, amoxicillin/clavulanate; AMK, amikacin; GEN, gentamicin; FOX, ceftazidime; CRO, ceftriaxone; CAZ, ceftazidime; FEP, cefepime; CIP, ciprofloxacin; ATM, aztreonam; SXT, trimethoprim/sulfamethoxazole; TET, tetracycline.

S: Susceptible; R: Resistant; I: Intermediate.



|    |   |   |   |   |   |   |   |   |   |   |   |   |   |   |    |
|----|---|---|---|---|---|---|---|---|---|---|---|---|---|---|----|
| 15 | R | R | R | R | R | R | R | R | R | R | R | R | R | S | S  |
| 16 | R | R | I | R | R | R | R | R | R | R | R | R | R | R | S  |
| 17 | R | R | R | R | R | R | R | R | R | R | R | S | R | S | S  |
| 18 | R | S | S | R | R | R | R | R | R | R | R | R | R | R | S  |
| 19 | I | R | R | R | R | R | R | R | R | R | R | R | R | R | S  |
| 20 | S | S | S | R | I | R | R | I | R | S | S | S | R | S | NT |
| 21 | I | R | I | R | I | R | R | I | S | S | S | S | R | S | NT |
| 22 | S | I | I | R | R | R | R | R | S | S | S | S | R | S | NT |
| 23 | S | S | S | R | S | R | R | I | R | S | S | S | R | S | NT |
| 24 | S | S | S | R | S | R | S | S | S | S | S | S | S | S | NT |

AMC, amoxicillin/clavulanate; AMK, amikacin; GEN, gentamicin; TOB, tobramycin; FOX, ceftaxime; CRO, ceftriaxone; CAZ, ceftazidime; FEP, cefepime; CIP, ciprofloxacin; IPM, imipenem; MEM, meropenem; ATM, aztreonam; SXT, trimethoprim/sulfamethoxazole; TET, tetracycline; TGC, tigecycline.

S: Susceptible; R: Resistant; I: Intermediate; NT: Not tested.

**Table S5.** Antibiotic resistance profile of *Pseudomonas aeruginosa*.

| Isolate No./Antibiotics | PTZ | TCC | AMK | GEN | TOB | CAZ | FEP | CIP | IMP | MEM | ATM | CT |
|-------------------------|-----|-----|-----|-----|-----|-----|-----|-----|-----|-----|-----|----|
| 1                       | S   | S   | S   | S   | R   | S   | S   | R   | R   | R   | S   | S  |
| 2                       | R   | R   | R   | R   | R   | S   | R   | R   | R   | R   | R   | R  |
| 3                       | S   | S   | R   | R   | R   | R   | R   | S   | R   | R   | S   | S  |
| 4                       | R   | R   | R   | R   | R   | S   | S   | R   | R   | R   | S   | S  |
| 5                       | R   | R   | R   | R   | R   | S   | R   | R   | R   | R   | R   | S  |
| 6                       | S   | R   | R   | R   | R   | S   | S   | R   | R   | R   | S   | S  |
| 7                       | R   | R   | R   | R   | R   | S   | R   | R   | R   | R   | R   | S  |
| 8                       | R   | R   | R   | R   | R   | R   | R   | R   | S   | R   | R   | R  |
| 9                       | S   | R   | R   | R   | R   | R   | R   | R   | R   | R   | R   | S  |

PTZ, piperacillin/tazobactam; TCC, ticarcillin/clavulanate; AMK, amikacin; GEN, gentamicin; TOB, tobramycin; CAZ, ceftazidime; FEP, cefepime; CIP, ciprofloxacin; IMP, imipenem; MEM, meropenem; ATM, aztreonam; CT, colistin.

S: Susceptible; R: Resistant.
